# Supplementary material
Source: publisher site journal article supplement (https://www.dovepress.com/article/410923)
Supplement: Supplementary file 1 [file get_supplementary_file.php]

**Supplementary Table 1** The computing method of CAR, CPR, NLR, PLR, and MLR

| Variables | formula |
| --- | --- |
| CAR | C-reaction protein (mg/L) to albumin (g/dL) Ratio |
| CPR | C-reaction protein (mg/L) to albumin (g/dL) Ratio |
| NLR | Neutrophilst count (10^9/L) to lymphocyte count (10^9/L) Ratio |
| PLR | Platelet count (10^9/L) to lymphocyte count (10^9/L) Ratio |
| MLR | monocyte count (10^9/L) to lymphocyte count (10^9/L) Ratio |

**Supplementary Table 2** The normality test of indicators associated with coagulation and inflammation in the training set.

| Variables | Risk | Statistics | Free degree | P value |
| --- | --- | --- | --- | --- |
| Age | IPTB | 0.907 | 78 | <0.001 |
| APTB | 0.906 | 103 | <0.001 |
| CAR | IPTB | 0.357 | 108 | <0.001 |
| APTB | 0.714 | 206 | <0.001 |
| CPR | IPTB | 0.41 | 108 | <0.001 |
| APTB | 0.208 | 206 | <0.001 |
| NLR | IPTB | 0.807 | 108 | <0.001 |
| APTB | 0.488 | 206 | <0.001 |
| MLR | IPTB | 0.858 | 108 | <0.001 |
| APTB | 0.814 | 206 | <0.001 |
| PLR | IPTB | 0.96 | 108 | 0.003 |
| APTB | 0.815 | 206 | <0.001 |
| ESR | IPTB | 0.79 | 108 | <0.001 |
| APTB | 0.965 | 206 | <0.001 |
| PT | IPTB | 0.149 | 108 | <0.001 |
| APTB | 0.418 | 206 | <0.001 |
| PTA | IPTB | 0.871 | 108 | <0.001 |
| APTB | 0.825 | 206 | <0.001 |
| INR | IPTB | 0.132 | 108 | <0.001 |
| APTB | 0.378 | 206 | <0.001 |
| APTT | IPTB | 0.996 | 108 | 0.995 |
| APTB | 0.167 | 206 | <0.001 |
| TT | IPTB | 0.759 | 108 | <0.001 |
| APTB | 0.811 | 206 | <0.001 |
| Fbg-C | IPTB | 0.964 | 108 | 0.005 |

**Abbreviations:** IPTB, inactive pulmonary tuberculosis; APTB, inactive pulmonary tuberculosis; CAR, C-reactive protein/prealbumin ratio; CPR,C-reactive protein/prealbumin ratio; NLR, Neutrophils count/lymphocyte count ratio; MLR, monocyte count/lymphocyte count ratio; PLR, Platelet count/lymphocyte count ratio; ESR, erythrocyte sedimentation rate; PT, prothrombin time; PTA, prothrombin time activity; INR, international normalized ratio; APTT, activated partial thromboplastin time; TT, thrombin time; Fbg-C, fibrinogen concentration.

**Supplementary Table 3** The levels of coagulation indexes and inflammation parameters in the training cohort

| Variable | APTB | IPTB | P value |
| --- | --- | --- | --- |
| CAR[median(25%, 75%)] | 0.45(0.12, 1.58) | 0.04(0.01, 0.09) | <0.001 |
| CPR[median(25%, 75%)] | 10.62(2.71, 50.14) | 0.75(0.29, 1.75) | <0.001 |
| NLR[median(25%, 75%)] | 3.41(2.18, 5.18) | 1.89(1.45, 2.36) | <0.001 |
| MLR[median(25%, 75%)] | 0.37(0.23, 0.55) | 0.19(0.15, 0.24) | <0.001 |
| PLR[median(25%, 75%)] | 202.00(145.35, 317.56) | 132.71(99.45, 165.06) | <0.001 |
| ESR[median(25%, 75%)] | 43.40(23.45, 67.43) | 12.50(7.85, 22.18) | <0.001 |
| PT[median(25%, 75%)] | 11.30(10.70, 12.00) | 10.80(10.30, 11.40) | <0.001 |
| PTA[median(25%, 75%)] | 97.20(84.60, 111.25) | 108.35(95.93, 119.70) | <0.001 |
| INR[median(25%, 75%)] | 0.98(0.92, 1.03) | 0.93(0.87, 0.98) | <0.001 |
| APTT[median(25%, 75%)] | 31.40(28.45, 34.63) | 29.15(26.1, 31.98) | <0.001 |
| TT[median(25%, 75%)] | 19.20(17.80, 21.85) | 19.40(18.13, 21.00) | 0.931 |
| Fbg-C[median(25%, 75%)] | 3.70(3.00, 4.70) | 2.60(2.20, 3.00) | <0.001 |

**Abbreviations:** IPTB, inactive pulmonary tuberculosis; APTB, inactive pulmonary tuberculosis; CAR, C-reactive protein/prealbumin ratio; CPR,C-reactive protein/prealbumin ratio; NLR, Neutrophils count/lymphocyte count ratio; MLR, monocyte count/lymphocyte count ratio; PLR, Platelet count/lymphocyte count ratio; ESR, erythrocyte sedimentation rate; PT, prothrombin time; PTA, prothrombin time activity; INR, international normalized ratio; APTT, activated partial thromboplastin time; TT, thrombin time; Fbg-C, fibrinogen concentration.

**Supplementary Table 4** Diagnostic performance of the scoring system in differentiating APTB from IPTB and negative-etiological PTB from IPTB in the training and internal validation cohort.

| Variable | APTB/IPTB | |
| --- | --- | --- |
| Training set | Internal validation set |
| AUC(95%CI) | 0.887(0.852-0.922) | 0.898 (0.852-0.944) |
| Sensitivity(95%CI) | 87.07(79.57% to 92.58%) | 89.74% (80.79% -95.47%) |
| Specificity(95%CI) | 80.09(74.06% to 85.26%) | 79.61% (70.54%-86.91%) |

**Abbreviations:** APTB, active pulmonary tuberculosis; IPTB, inactive pulmonary tuberculosis; AUC, area under curve; CI, confidence interval.

**Additional information 1:** "rms" was used to construct nomogram and perform calibration curve. "mstate" was used to develop a logistic regression model. "ROCR" was used for ROC analysis. "ggplot2" and "ggcorrplot" were used to data visualization.
